# Supplementary figures and images for: Rat NaV1.7 loss-of-function genetic model: Deficient nociceptive and neuropathic pain behavior with retained olfactory function and intra-epidermal nerve fibers
Source: PubMed Central journal article supplement — Mol Pain. 2019 Nov 5;15:1744806919881846. doi: 10.1177/1744806919881846 (PMC6831982; doi:10.1177/1744806919881846), 2019-11-05

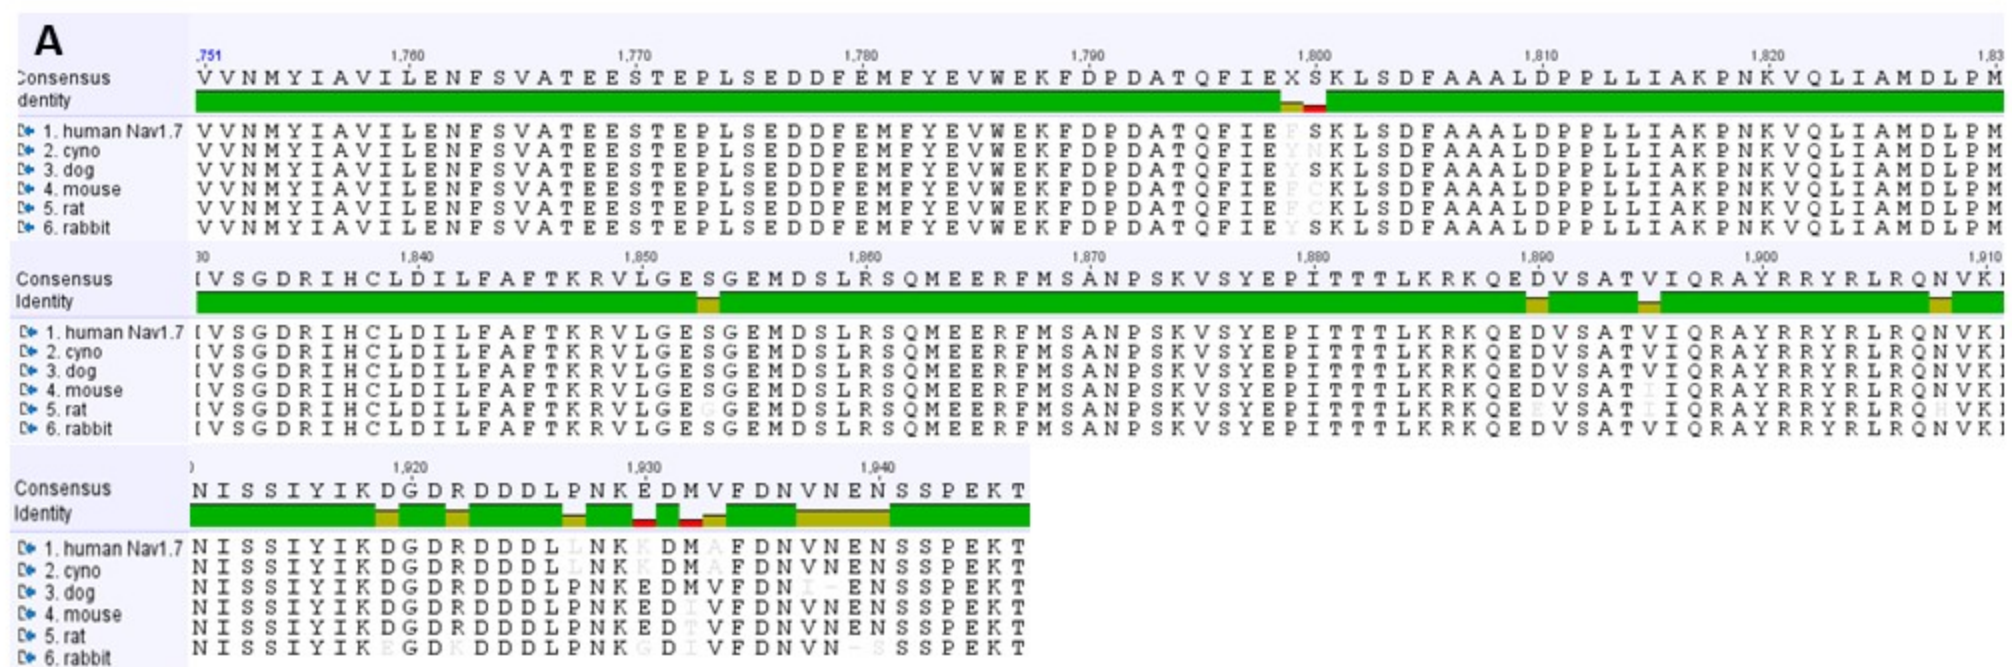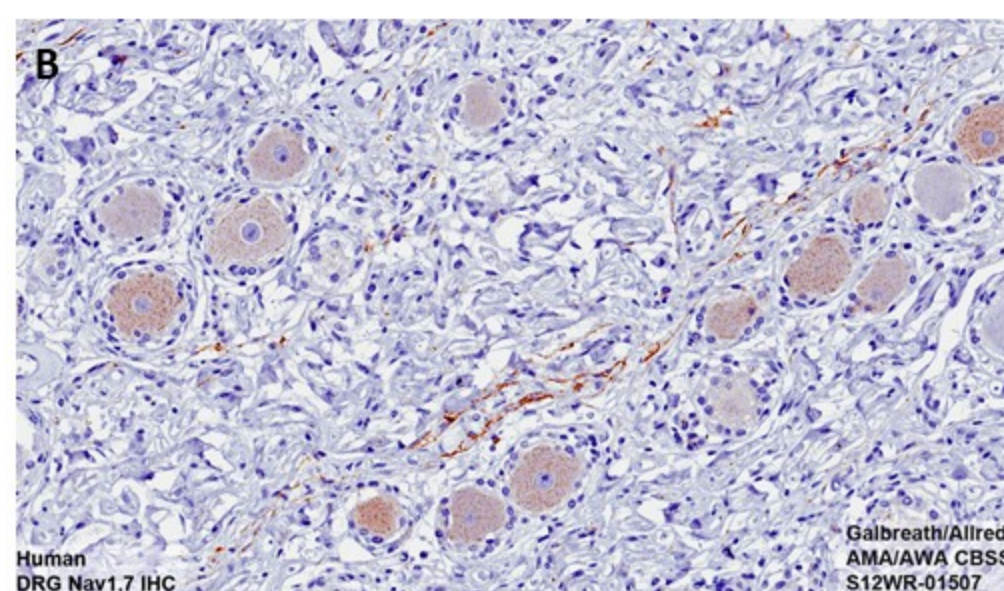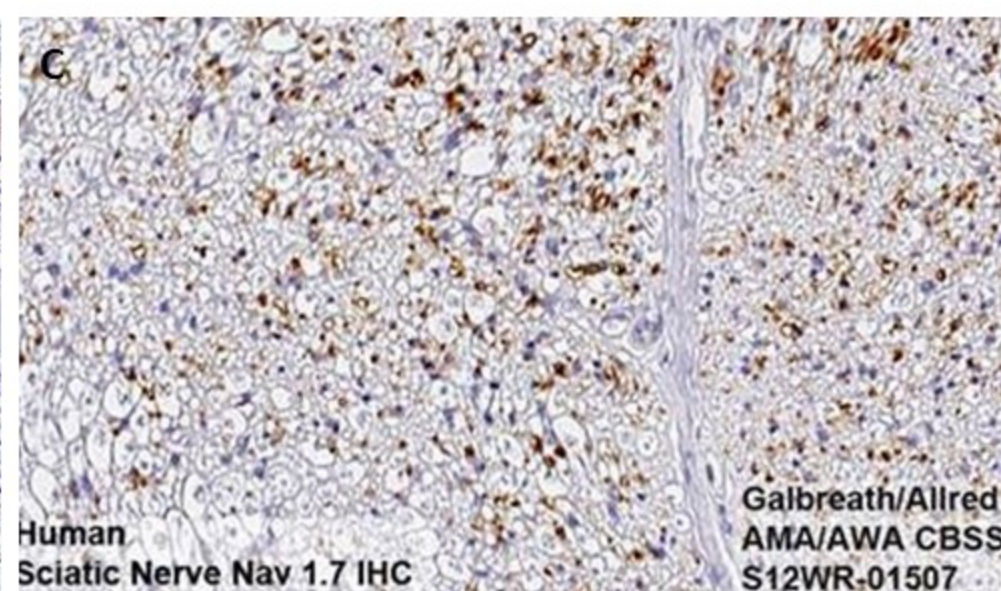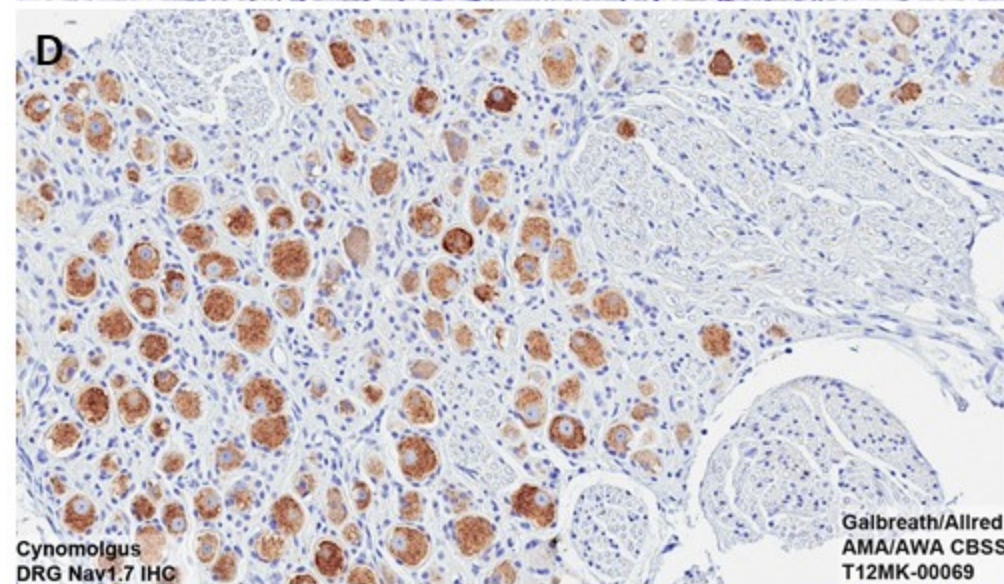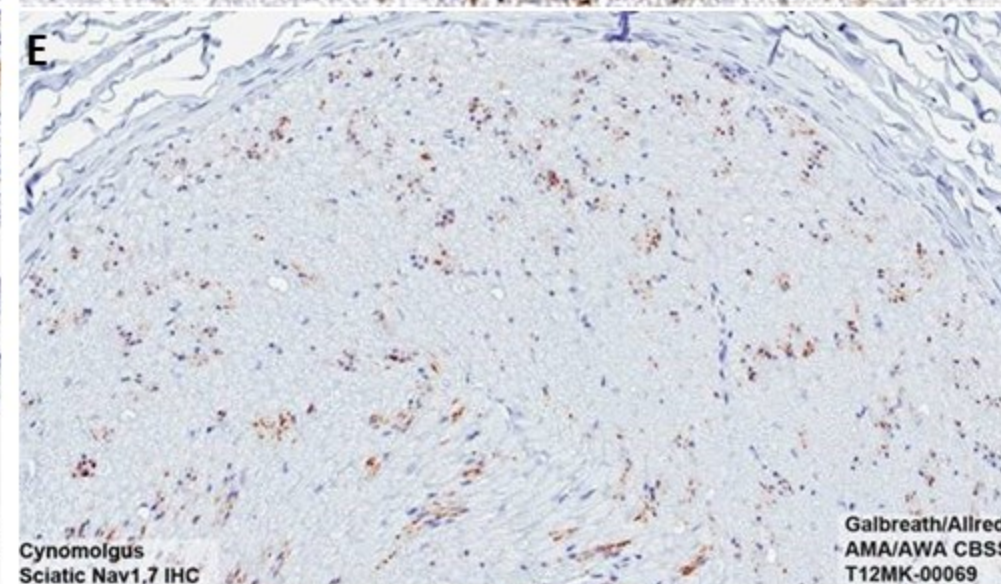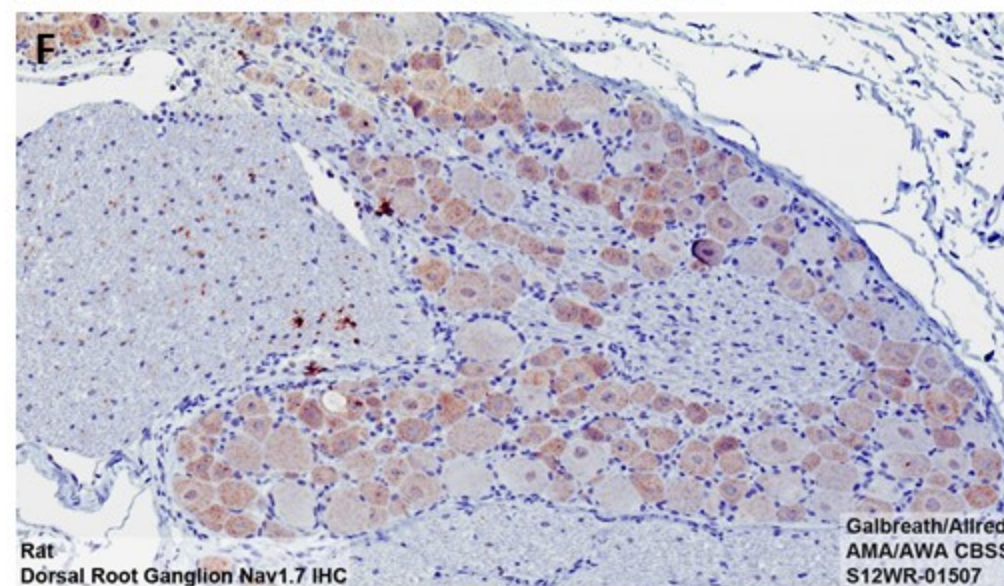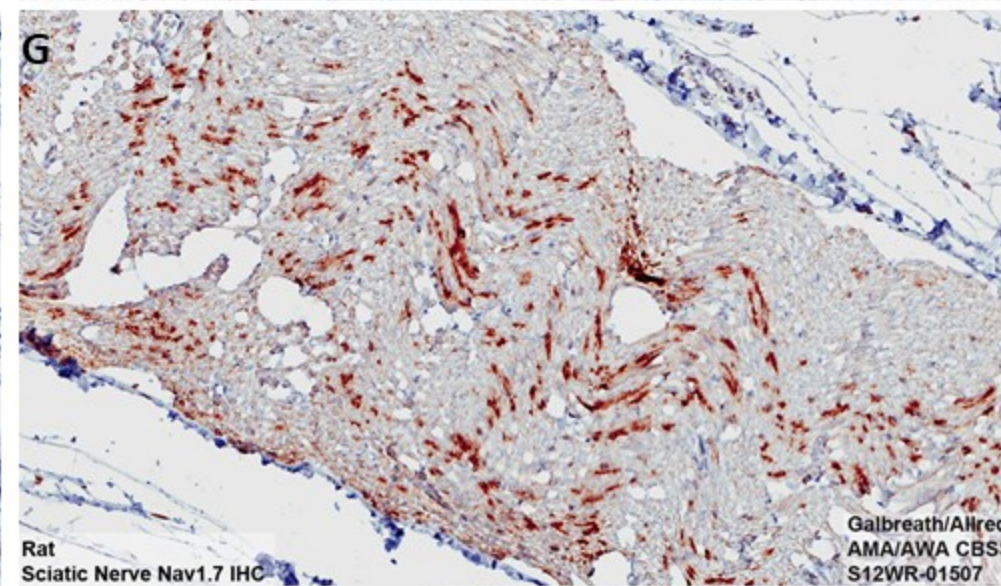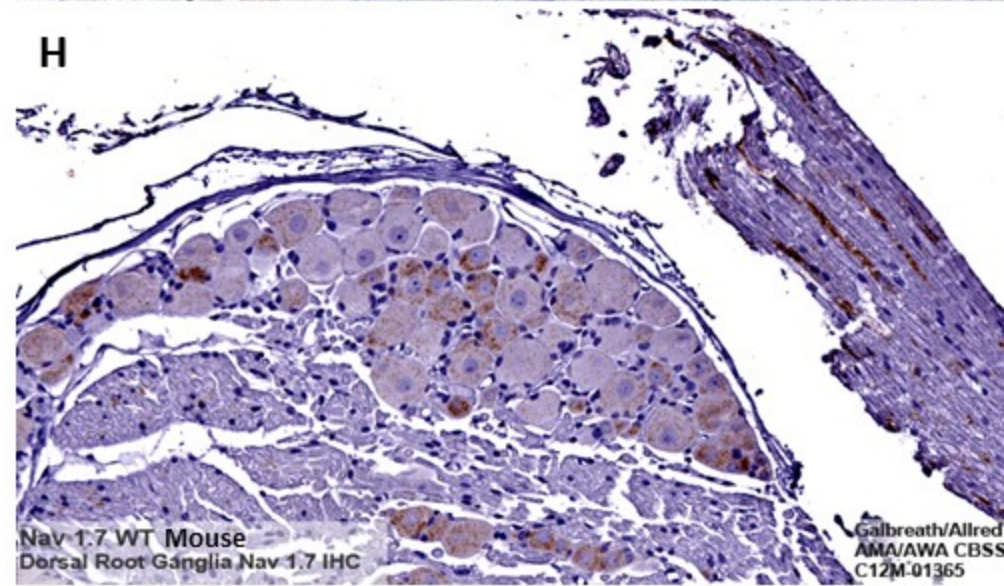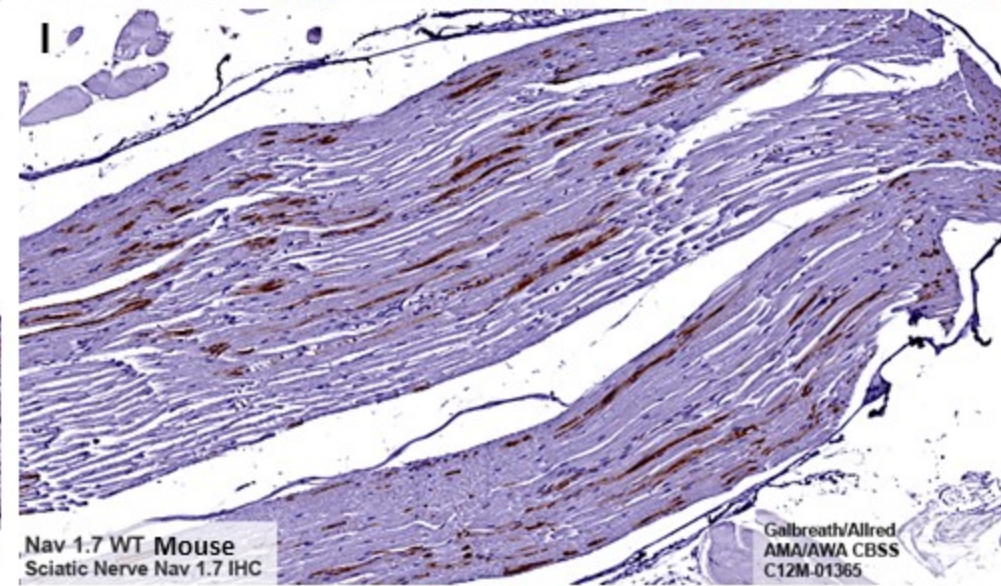

Supplement: MPX881846_Supplemental_Material1.pdf [file MPX881846_Supplemental_Material1.pdf]

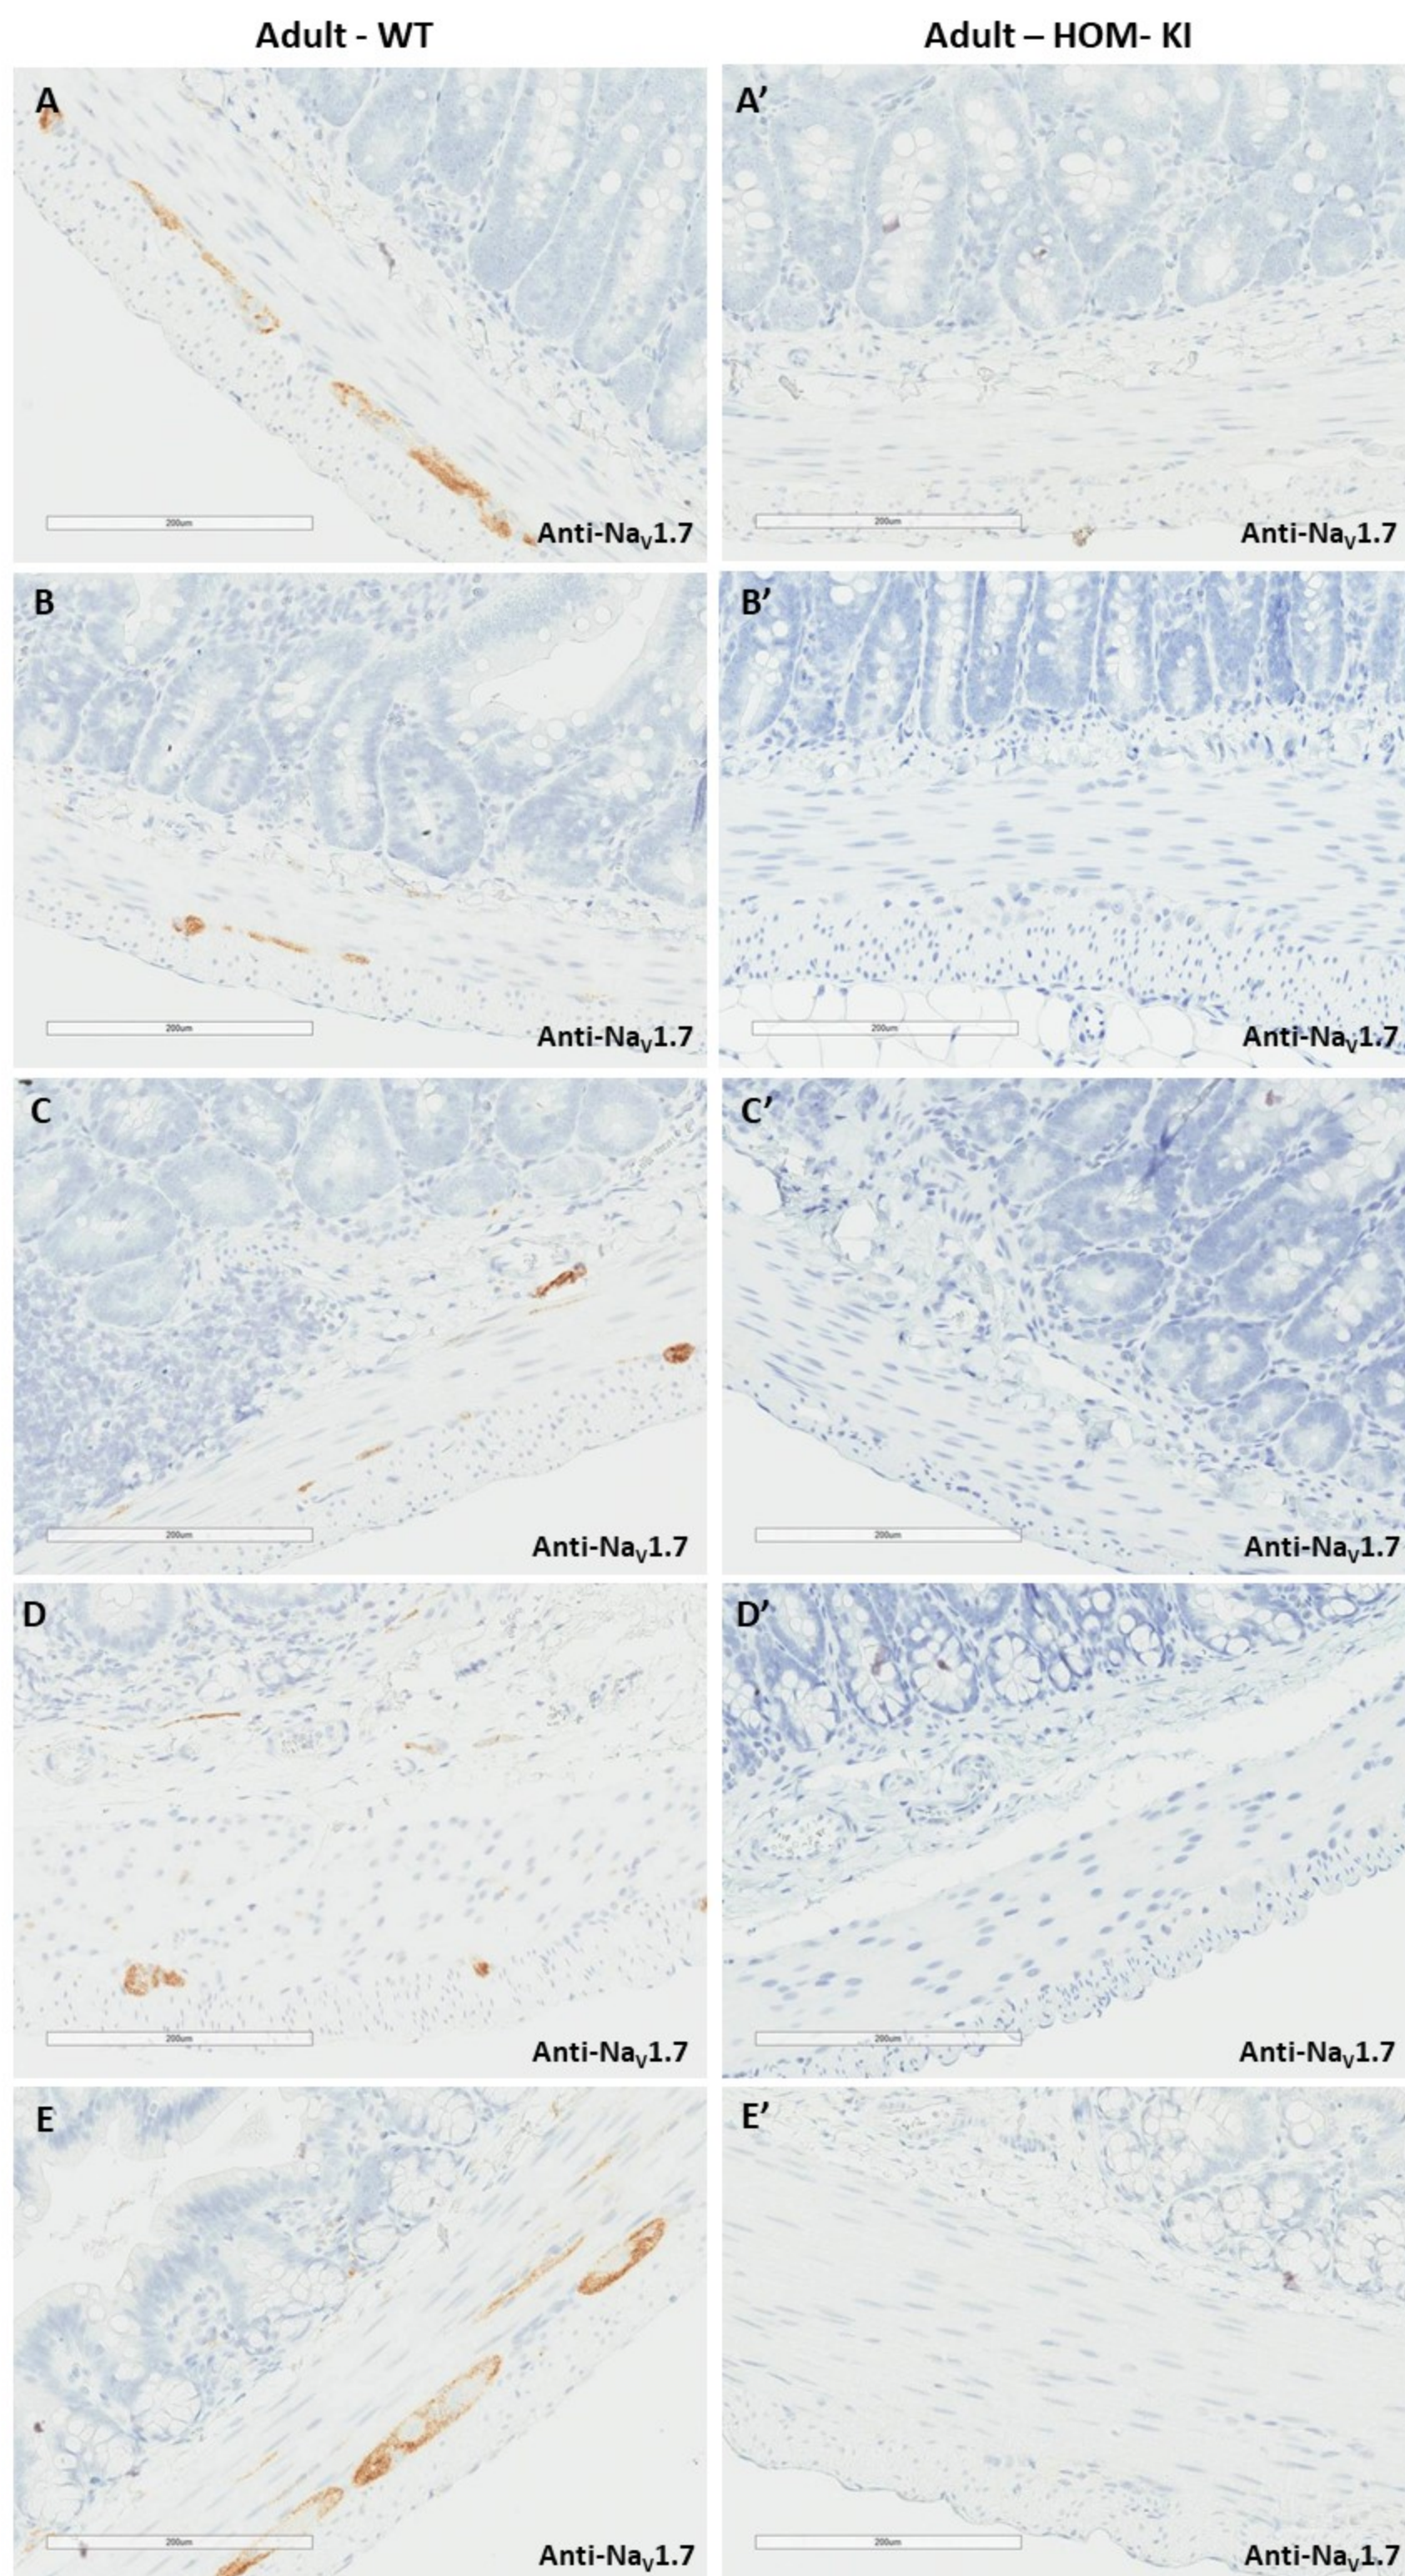

Supplement: MPX881846_Supplemental_Material2.pdf [file MPX881846_Supplemental_Material2.pdf]
